# Supplementary material
Source: PubMed Central journal article supplement (PMC4993627)
Supplement: NIHMS793567-supplement-Supplemental_Digital_Content.pdf [file NIHMS793567-supplement-Supplemental_Digital_Content.pdf]

**Appendix 1.** Comparison of regression models for estimating hCG rise in a viable intrauterine pregnancy. *Triangles* indicate the model that assumes a linear relationship between days and log transformed hCG, and *circles* indicate the model that assumes a quadratic association between days and log-transformed hCG. Dotted lines indicate the 95% confidence intervals.

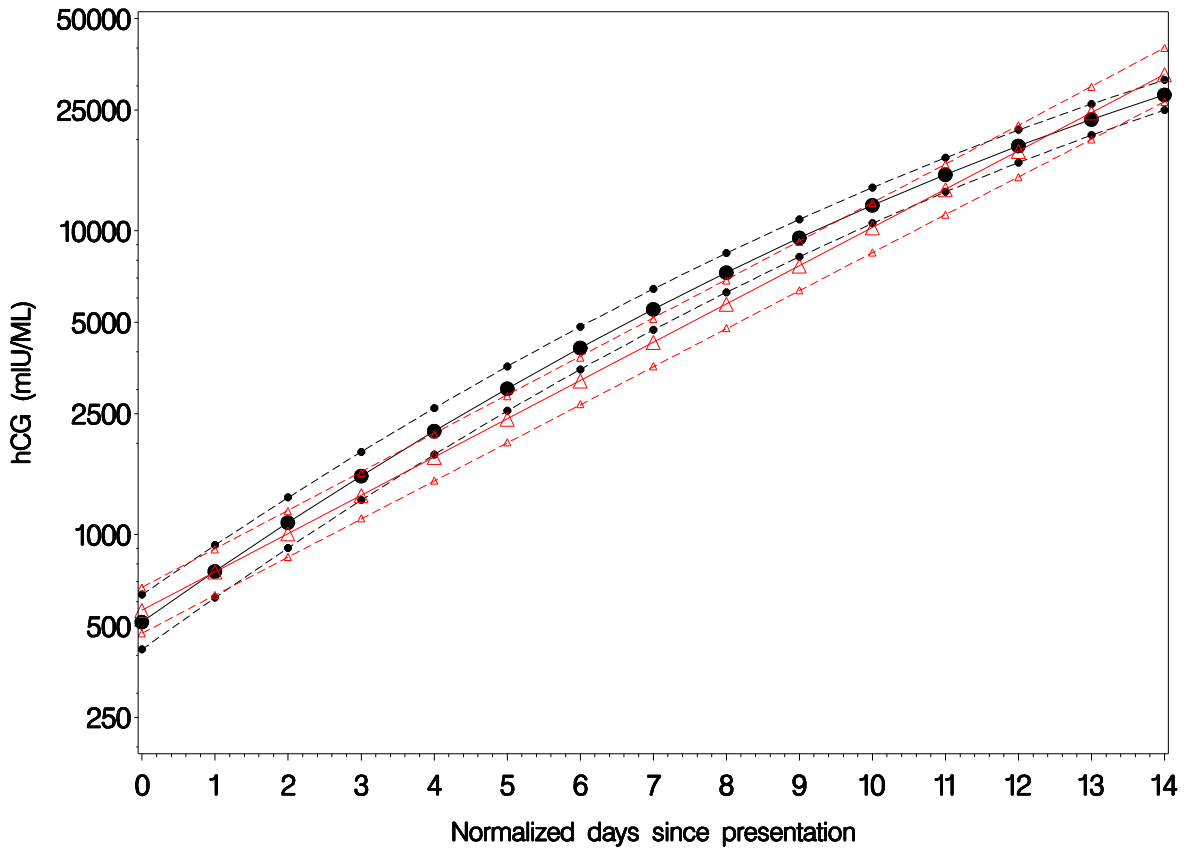

Barnhart KT, et al. Differences in serum human chorionic gonadotrophin rise in early pregnancy by race and value at presentation. *Obstet Gynecol* 2016;128.

The authors provided this information as a supplement to their article.

Copyright © 2016 by The American College of Obstetricians and Gynecologists.
